# Supplementary material
Source: PubMed Central journal article supplement (PMC4913794)
Supplement: JZUSB17-0455-FS1.pdf [file JZUSB17-0455-FS1.pdf]

## Supplement materials

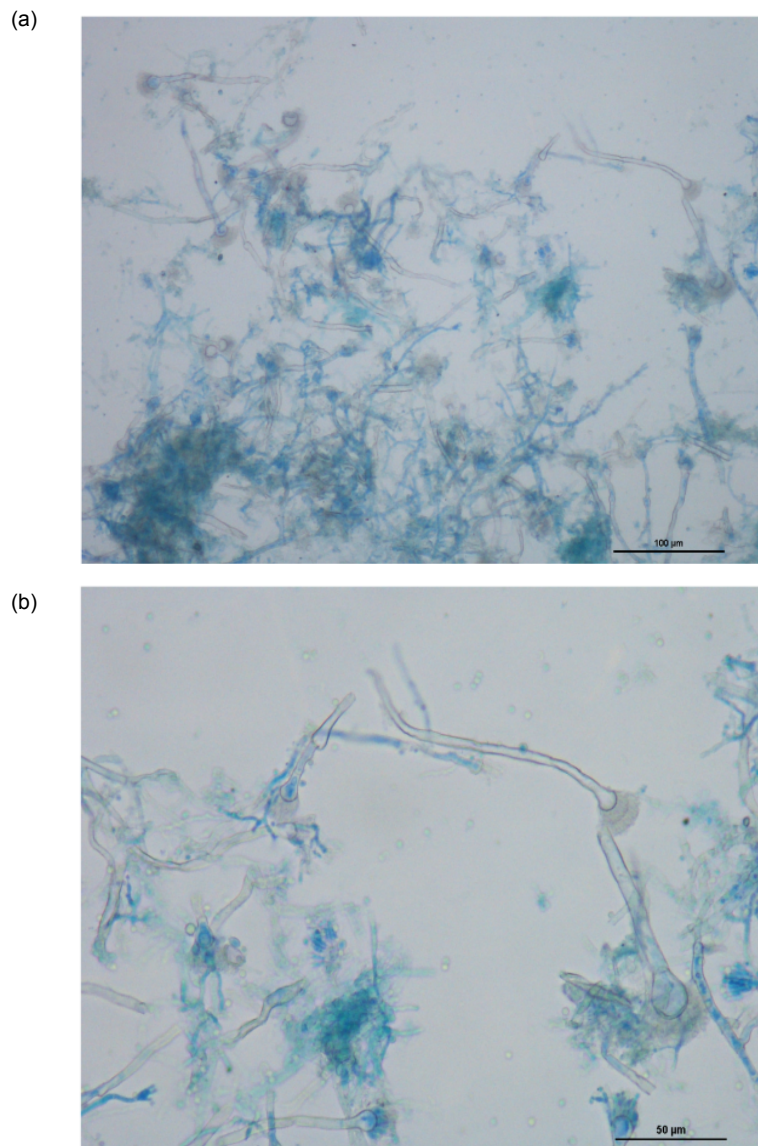

**Fig. S1 Morphology of *A. terreus* culture mycelium**

(a) Morphology of *A. terreus* culture mycelium under 200 magnified version after staining with Methylene Blue Method, with the staining procedures as following: (1) flood slide with 0.3% aqueous solution of methylene blue for 5 min; (2) rinse, air dry and examine under microscope. (b) Morphology of *A. terreus* culture mycelium under 400 magnified version after staining with Methylene Blue Method
